# Supplementary material
Source: PubMed Central journal article supplement (PMC5148705)
Supplement: NIHMS831517-supplement-Fig__S1-S7__Table_S1.pdf [file NIHMS831517-supplement-Fig__S1-S7__Table_S1.pdf]

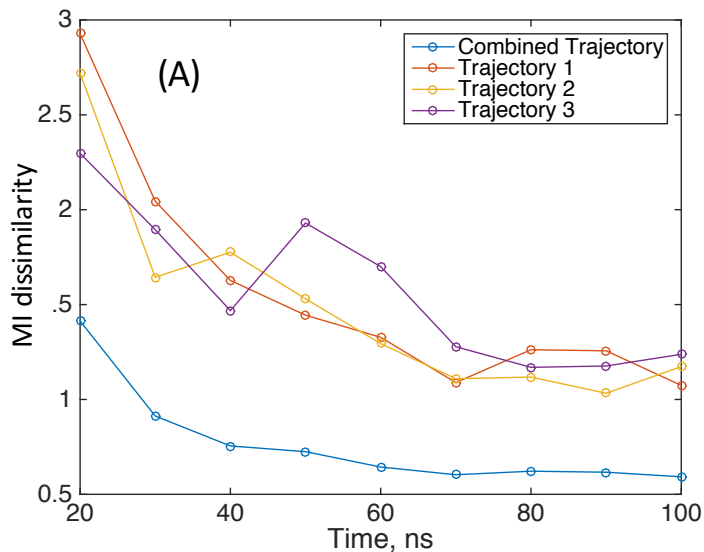

(B)

| Res no.    | Allosteric hub score |      |
|------------|----------------------|------|
|            | 2Y03                 | 4BVN |
| <b>75</b>  | 9                    | 13   |
| <b>80</b>  | 19                   | 11   |
| 107        | 14                   | 215  |
| <b>122</b> | 20                   | 17   |
| <b>128</b> | 6                    | 3    |
| <b>139</b> | 10                   | 19   |
| 155        | 48                   | 20   |
| 180        | 15                   | 43   |
| <b>183</b> | 2                    | 8    |
| 193        | 13                   | 29   |
| 215        | 18                   | 28   |
| <b>223</b> | 12                   | 12   |
| <b>229</b> | 5                    | 4    |
| <b>232</b> | 1                    | 16   |
| <b>237</b> | 4                    | 18   |
| 239        | 17                   | 21   |
| <b>241</b> | 8                    | 6    |
| <b>246</b> | 3                    | 2    |
| 247        | 144                  | 1    |
| 249        | 42                   | 5    |
| <b>252</b> | 16                   | 7    |
| 253        | 105                  | 15   |
| 258        | 33                   | 10   |
| 317        | 11                   | 31   |
| 339        | 94                   | 14   |
| <b>345</b> | 7                    | 9    |

Fig. S1. (A) dissimilarity of the MI matrix with the preceding ensemble plotted with increasing trajectory length; root mean square deviation is used as the metric for dissimilarity; (B) Comparison of hub strengths of the top allosteric hubs obtained from simulations starting from two different crystal structures of  $\beta_1$ AR (pdb ID: 2Y03 and 4BVN); the blue shaded boxes indicate allosteric hub scores in the top 20; the residues that are identified as top allosteric hubs in both simulations are highlighted in red.

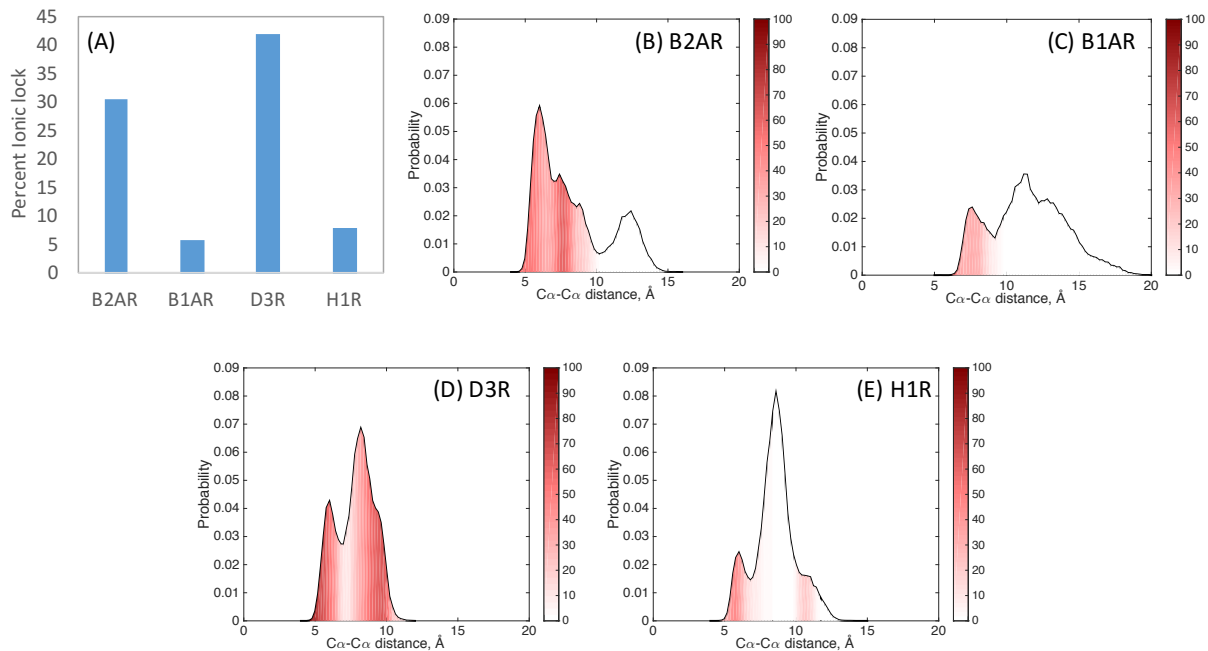

Fig. S2 (A) Percentage of conformations bearing the ionic lock during the MD simulations of biogenic amine receptors; (B-E) Probability of observing the ionic lock as function of TM3-TM6 distance; (B)  $\beta_2$ AR; (C)  $\beta_1$ AR; (D) D $_3$ R; (E) H $_1$ R

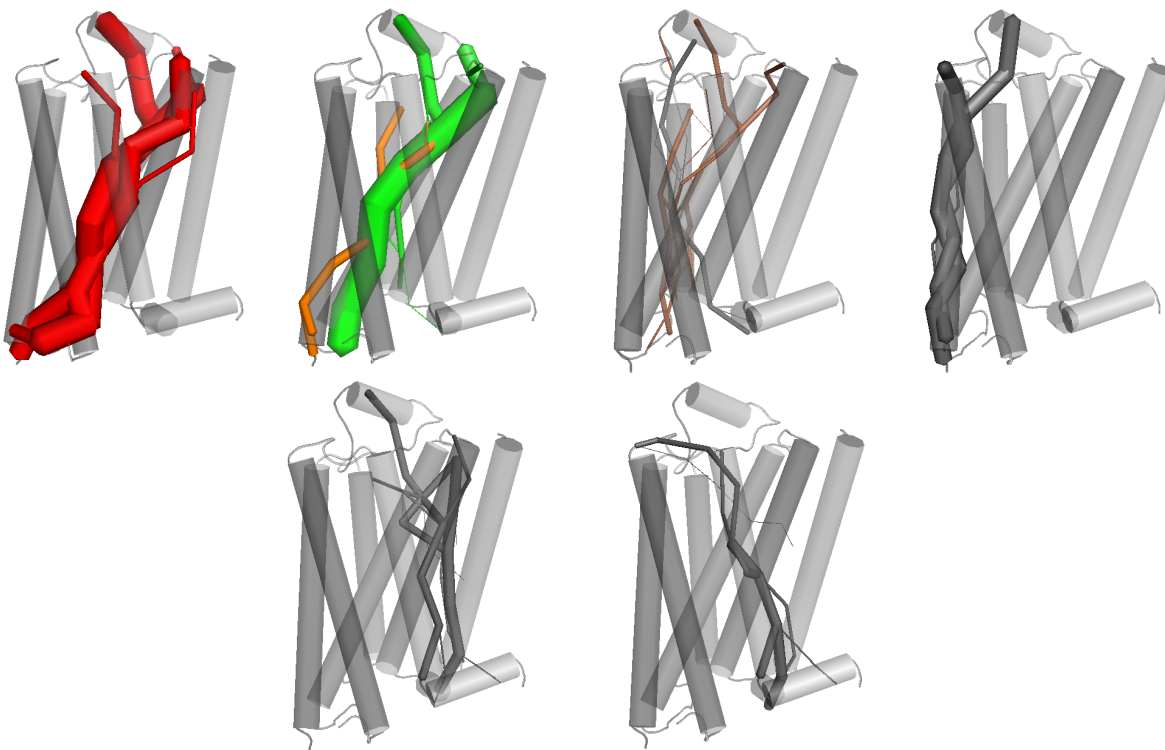

Fig. S3 Conserved allosteric pipelines in biogenic amine receptors superimposed onto the  $\beta_2$ AR structure

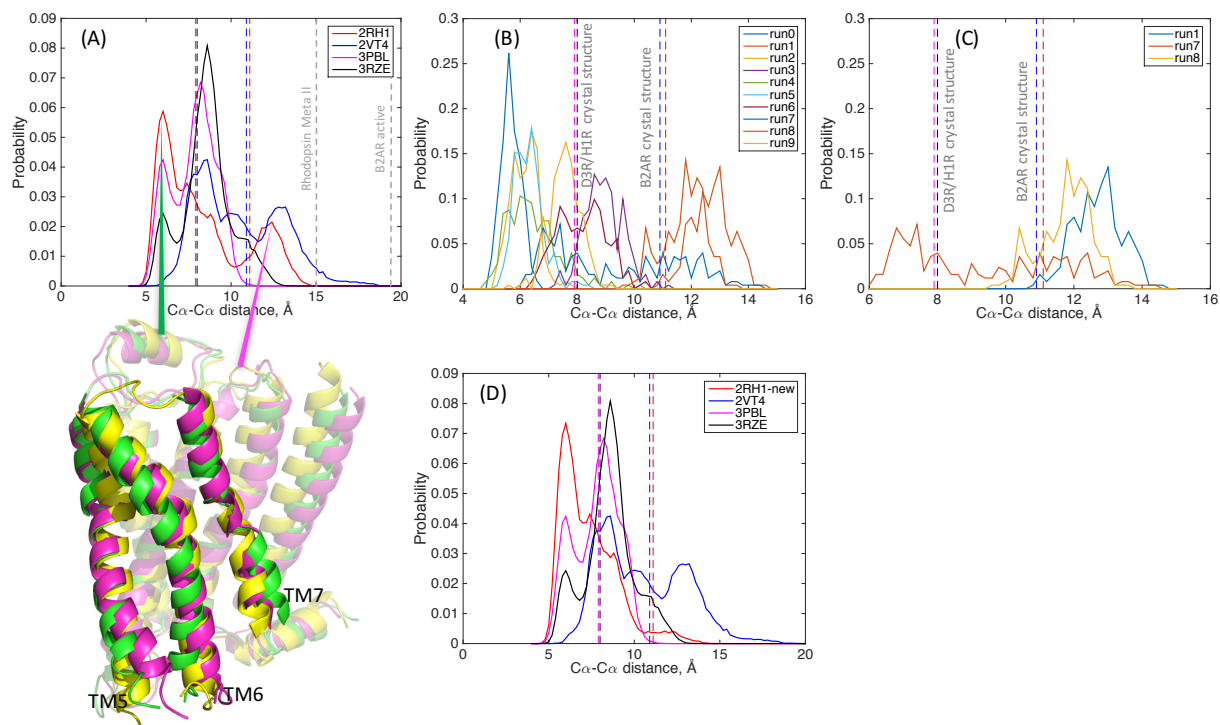

Fig. S4 (A) Representative structures from the collapsed and open states of  $\beta_2$ AR; green: collapsed conformation; magenta: open conformation; yellow: inactive  $\beta_2$ AR crystal structure; the locations of the structures in the TM3-TM6 distribution of  $\beta_2$ AR are shown; (B) TM3-TM6 distance distributions of individual MD trajectories of  $\beta_2$ AR; (C) TM3-TM6 distance distributions of the  $\beta_2$ AR trajectories which sample the open conformations; (D) TM3-TM6 distance distributions for  $\beta_2$ AR excluding the open conformations.

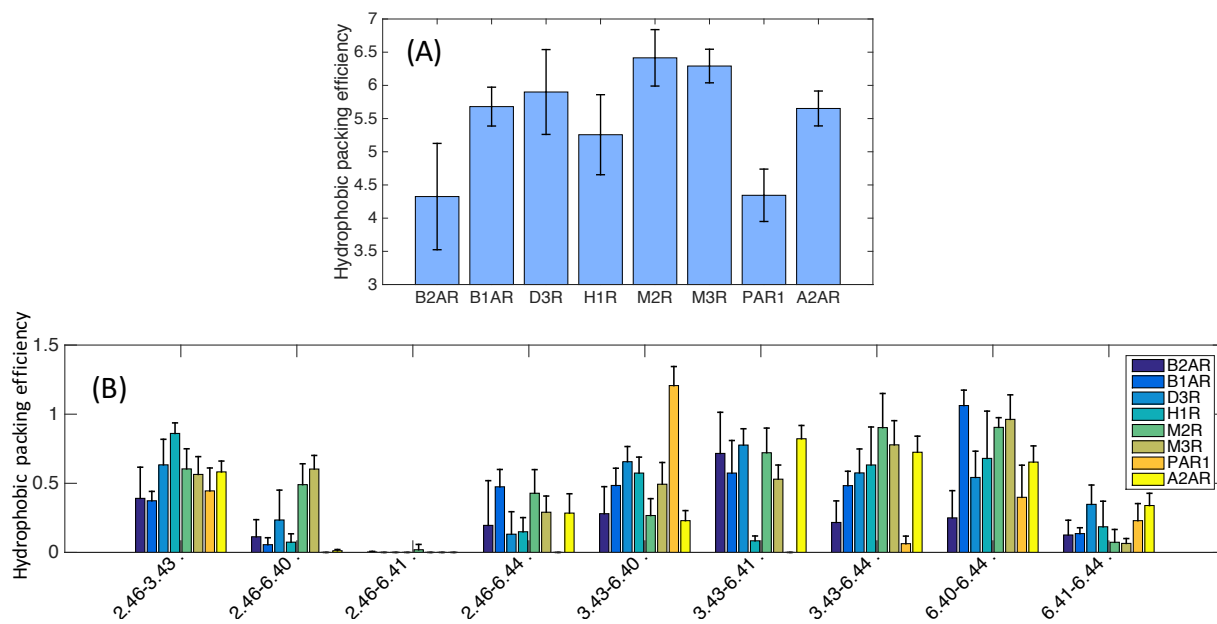

Fig. S5 (A) Interhelical residue packing efficiency among the hydrophobic residues in the middle of TM2, TM3 and TM6 as observed during the dynamics of different biogenic amine receptors as well as PAR1 and A2AR; (B) packing efficiency for each inter-residue contact; error bars represent 95% confidence limits.

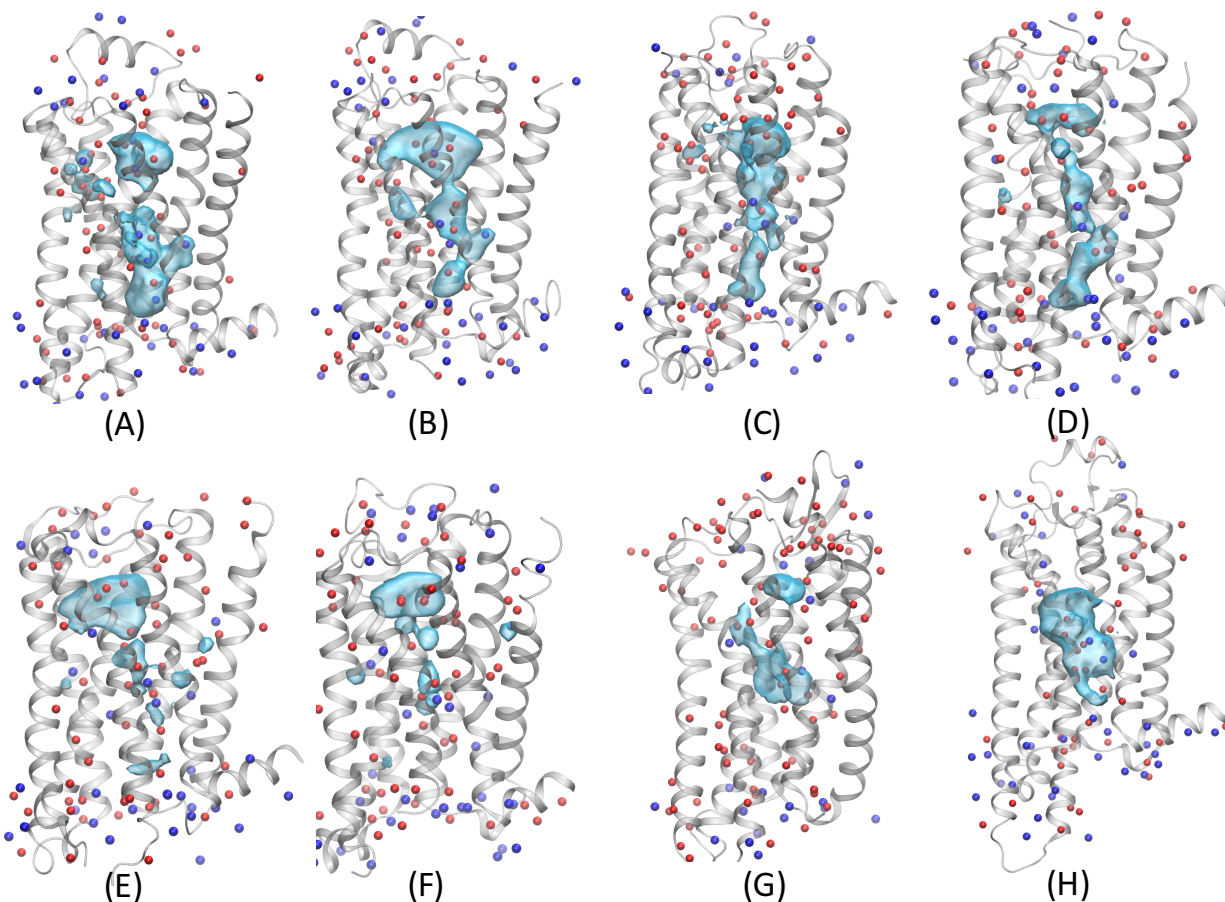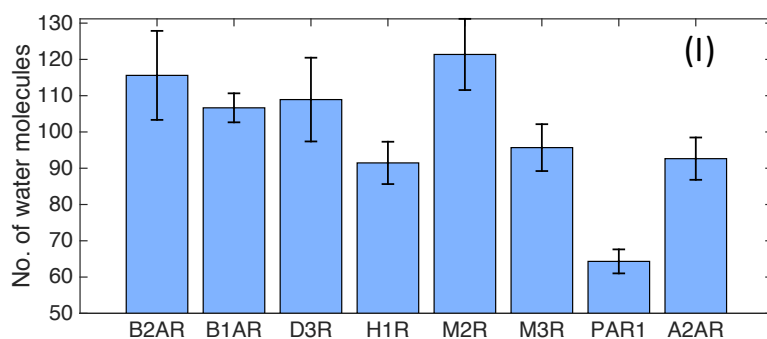

Fig. S6 (A-H) representative snapshots from the dynamics trajectories of the different GPCRs showing the water penetration within the TM domains; A:  $\beta_2$ AR; B:  $\beta_1$ AR; C: D<sub>3</sub>R; D: H<sub>1</sub>R; E: M<sub>2</sub>R; F: M<sub>3</sub>R; G: PAR1; H: A<sub>2A</sub>R; the sidechain atoms with OH/H groups that are exchangeable with water are shown as red (Ser, Thr, Tyr, Asp, Glu) and blue (Asn, Gln, Lys, Arg) spheres; (I) Average

number of water molecules within the TM domain during the MD simulations; error bars represent 95% confidence limits.

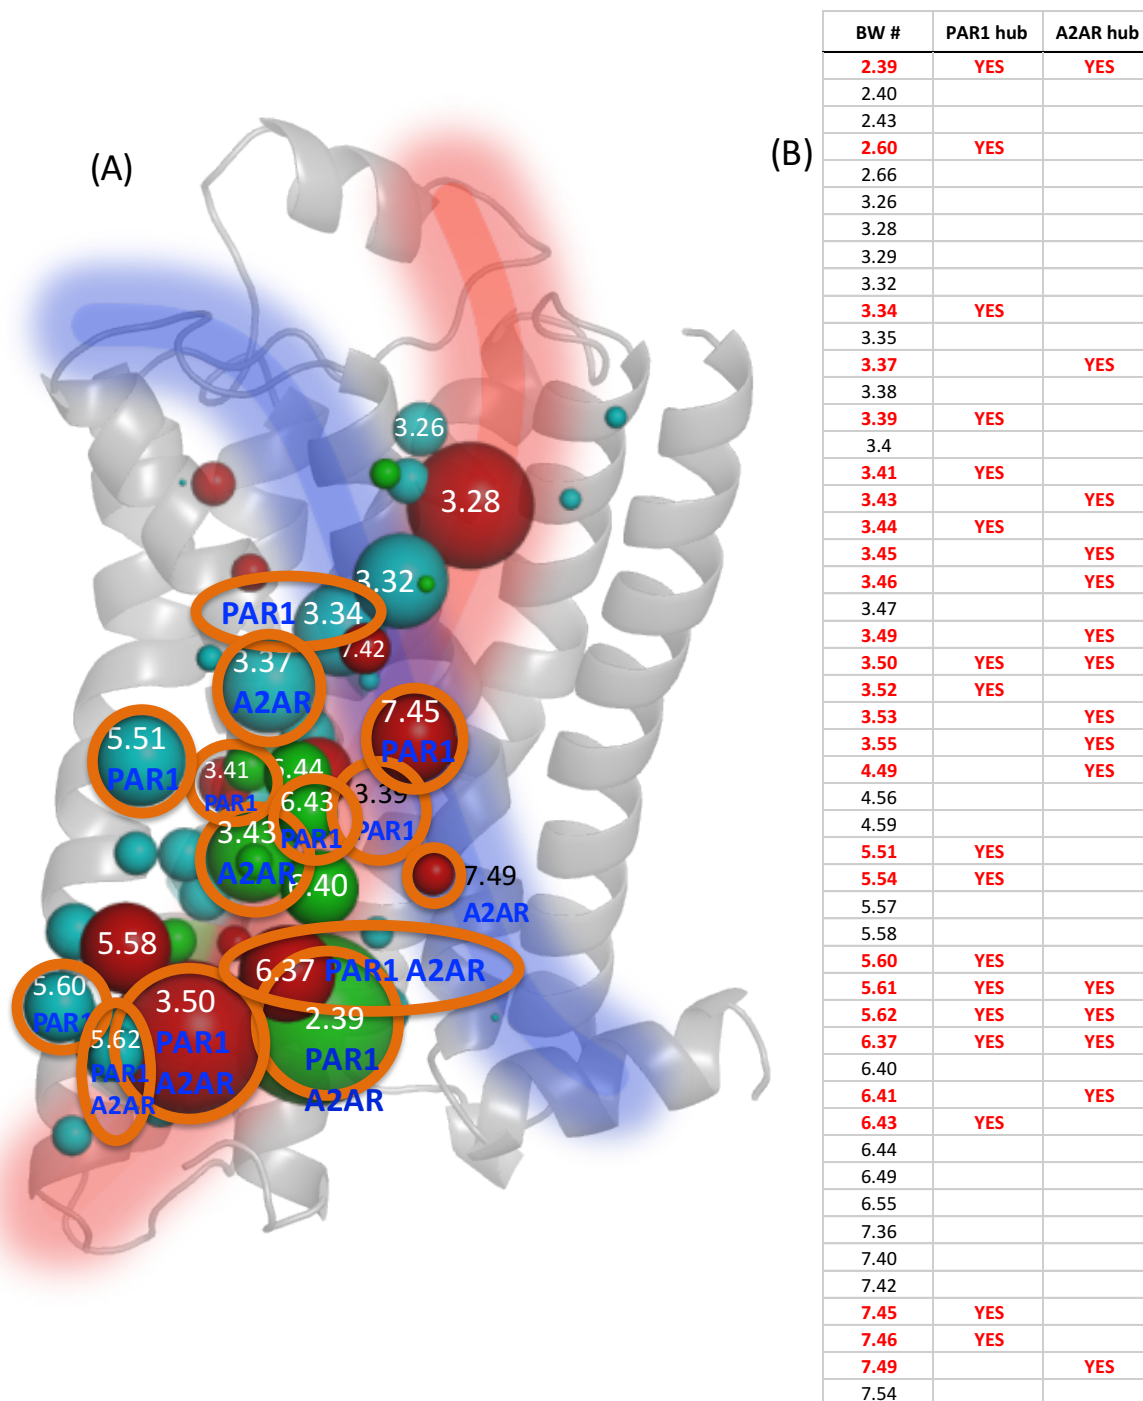

Fig. S7. (A) Conserved allosteric hubs among the biogenic amine receptors shown as spheres; the radii of the spheres are proportional to the average strength of allosteric communication mediated by each of these residues; the allosteric hubs that are UCMs or CAMs in one or more receptors are highlighted in red and green respectively; residues that are also allosteric hubs in

two other class A GPCRs (A<sub>2A</sub>R and PAR1) are highlighted by orange circles along with the name of the receptor where they are conserved labeled in blue; (B) list of conserved allosteric hubs in biogenic amine receptors specified according to their Ballesteros-Weinstein (BW) numbers; residues that are also allosteric hubs in A<sub>2A</sub>R or PAR1 are highlighted in red.

Table S1. List of experimentally mutated residues and their effects

| Residue<br>(BW<br>numbering) | CAM/UCM | Reference |
|------------------------------|---------|-----------|
| 2.39                         | CAM     | 1         |
| 3.28                         | UCM     | 2         |
| 3.39                         | UCM     | 3         |
| 3.40                         | CAM     | 4         |
| 3.41                         | UCM     | 5         |
| 3.43                         | CAM     | 6         |
| 3.46                         | UCM     | 7         |
| 3.47                         | CAM     | 4         |
| 3.50                         | UCM     | 8         |
| 4.56                         | UCM     | 9         |
| 5.58                         | UCM     | 10        |
| 6.37                         | UCM     | 11        |
| 6.40                         | CAM     | 12        |
| 6.43                         | CAM     | 12        |
| 6.44                         | CAM     | 12        |
| 7.36                         | CAM     | 13        |
| 7.42                         | UCM     | 14        |
| 7.45                         | UCM     | 15        |
| 7.46                         | UCM     | 16        |
| 7.49                         | UCM     | 15        |

### References

- (1) Beukers, M. W.; van Oppenraaij, J.; van der Hoorn, P. P.; Blad, C. C.; den Dulk, H.; Brouwer, J.; AP, I. J. *Mol. Pharmacol.* **2004**, *65*, 702-710.
- (2) Leach, K.; Davey, A. E.; Felder, C. C.; Sexton, P. M.; Christopoulos, A. *Mol. Pharmacol.* **2011**, *79*, 855-865.
- (3) Cavalli, A.; Fanelli, F.; Taddei, C.; De Benedetti, P. G.; Cotecchia, S. *FEBS Lett.* **1996**, *399*, 9-13.
- (4) Lu, Z. L.; Hulme, E. C. *J. Biol. Chem.* **1999**, *274*, 7309-7315.
- (5) Hanson, M. A.; Cherezov, V.; Griffith, M. T.; Roth, C. B.; Jaakola, V. P.; Chien, E. Y.; Velasquez, J.; Kuhn, P.; Stevens, R. C. *Structure.* **2008**, *16*, 897-905.

- (6) Tao, Y. X.; Abell, A. N.; Liu, X.; Nakamura, K.; Segaloff, D. L. *Mol. Endocrinol.* **2000**, *14*, 1272-1282.
- (7) Javitch, J. A.; Fu, D.; Chen, J.; Karlin, A. *Neuron.* **1995**, *14*, 825-831.
- (8) Zhu, S. Z.; Wang, S. Z.; Hu, J.; el-Fakahany, E. E. *Mol. Pharmacol.* **1994**, *45*, 517-523.
- (9) Warne, T.; Moukhametzianov, R.; Baker, J. G.; Nehme, R.; Edwards, P. C.; Leslie, A. G.; Schertler, G. F.; Tate, C. G. *Nature.* **2011**, *469*, 241-244.
- (10) Serrano-Vega, M. J.; Magnani, F.; Shibata, Y.; Tate, C. G. *Proc. Natl. Acad. Sci. U S A.* **2008**, *105*, 877-882.
- (11) Greasley, P. J.; Fanelli, F.; Rossier, O.; Abuin, L.; Cotecchia, S. *Mol. Pharmacol.* **2002**, *61*, 1025-1032.
- (12) Spalding, T. A.; Burstein, E. S.; Henderson, S. C.; Ducote, K. R.; Brann, M. R. *J. Biol. Chem.* **1998**, *273*, 21563-21568.
- (13) Porter, J. E.; Hwa, J.; Perez, D. M. *J. Biol. Chem.* **1996**, *271*, 28318-28323.
- (14) Savarese, T. M.; Wang, C. D.; Fraser, C. M. *J. Biol. Chem.* **1992**, *267*, 11439-11448.
- (15) Barak, L. S.; Menard, L.; Ferguson, S. S.; Colapietro, A. M.; Caron, M. G. *Biochemistry.* **1995**, *34*, 15407-15414.
- (16) Strader, C. D.; Candelore, M. R.; Hill, W. S.; Sigal, I. S.; Dixon, R. A. *J. Biol. Chem.* **1989**, *264*, 13572-13578.
